# Supplementary material
Source: PubMed Central journal article supplement (PMC10508302)
Supplement: NIHMS1900193-supplement-Supplemental_Material.pdf [file NIHMS1900193-supplement-Supplemental_Material.pdf]

FIGURE S1

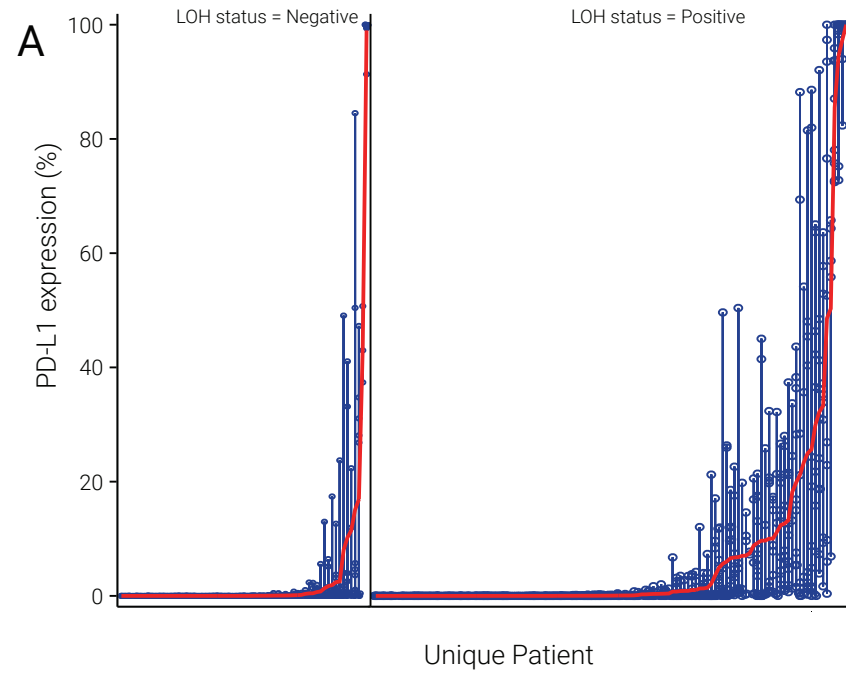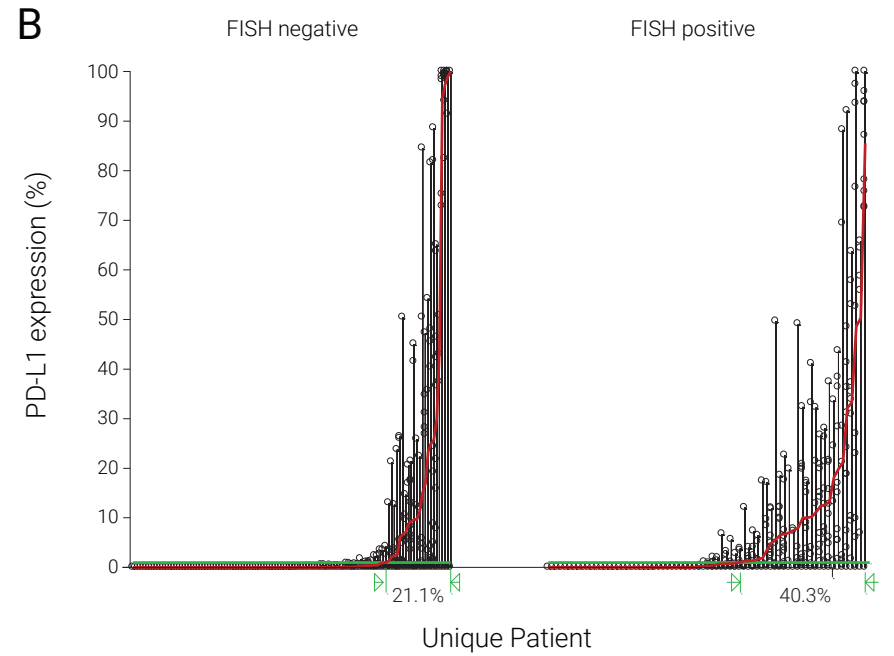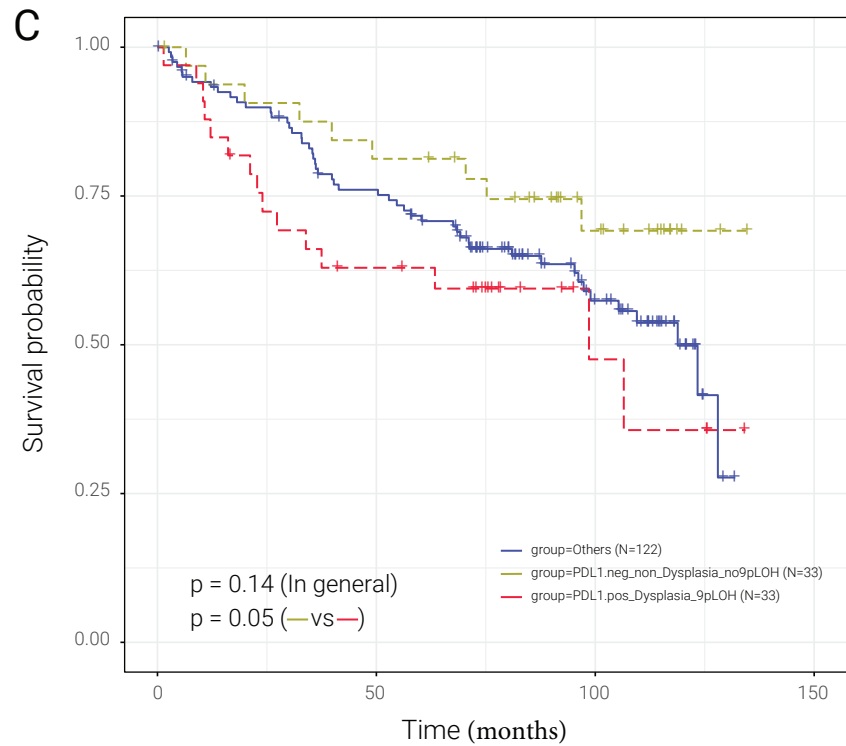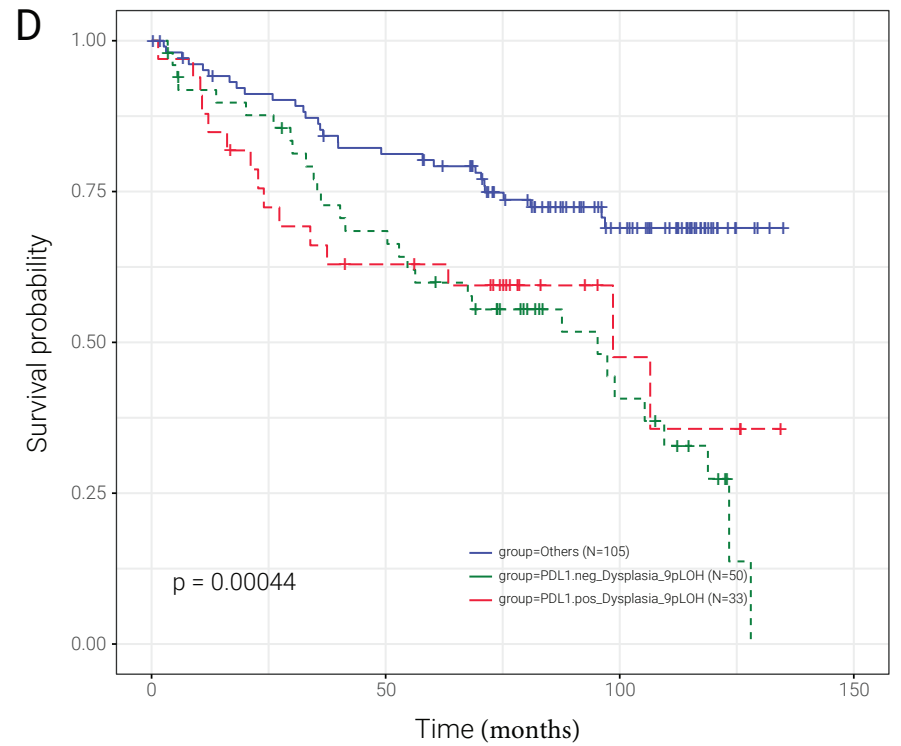

### Supplemental Figure 1

- A) PD-L1 expression for LOH negative patients and LOH positive patients.
- B) PD-L1 expression for chr7 polysomy negative (FISH-negative) and positive (FISH-positive) patients.
- C) Kaplan-Meier plots (months) for dysplasia, 9pLOH and PDL1 level based on RPA analysis. Yellow line represents patients with no dysplasia, no 9pLOH and PDL1 percentage <1% (N=33). Red line represents patients with dysplasia, 9pLOH and PDL1 percentage  $\geq$ 1% (N=33). Blue line represents other patients (N=122).
- D) Kaplan-Meier plots (months) for dysplasia, 9pLOH and PDL1 level based on RPA analysis. Red line represents patients with dysplasia, 9pLOH and PDL1 percentage  $\geq$ 1% (N=33). Green line represents patients with dysplasia, 9pLOH and PDL1 percentage <1% (N=50). Blue line represents other patients (N=105).

Figure S2

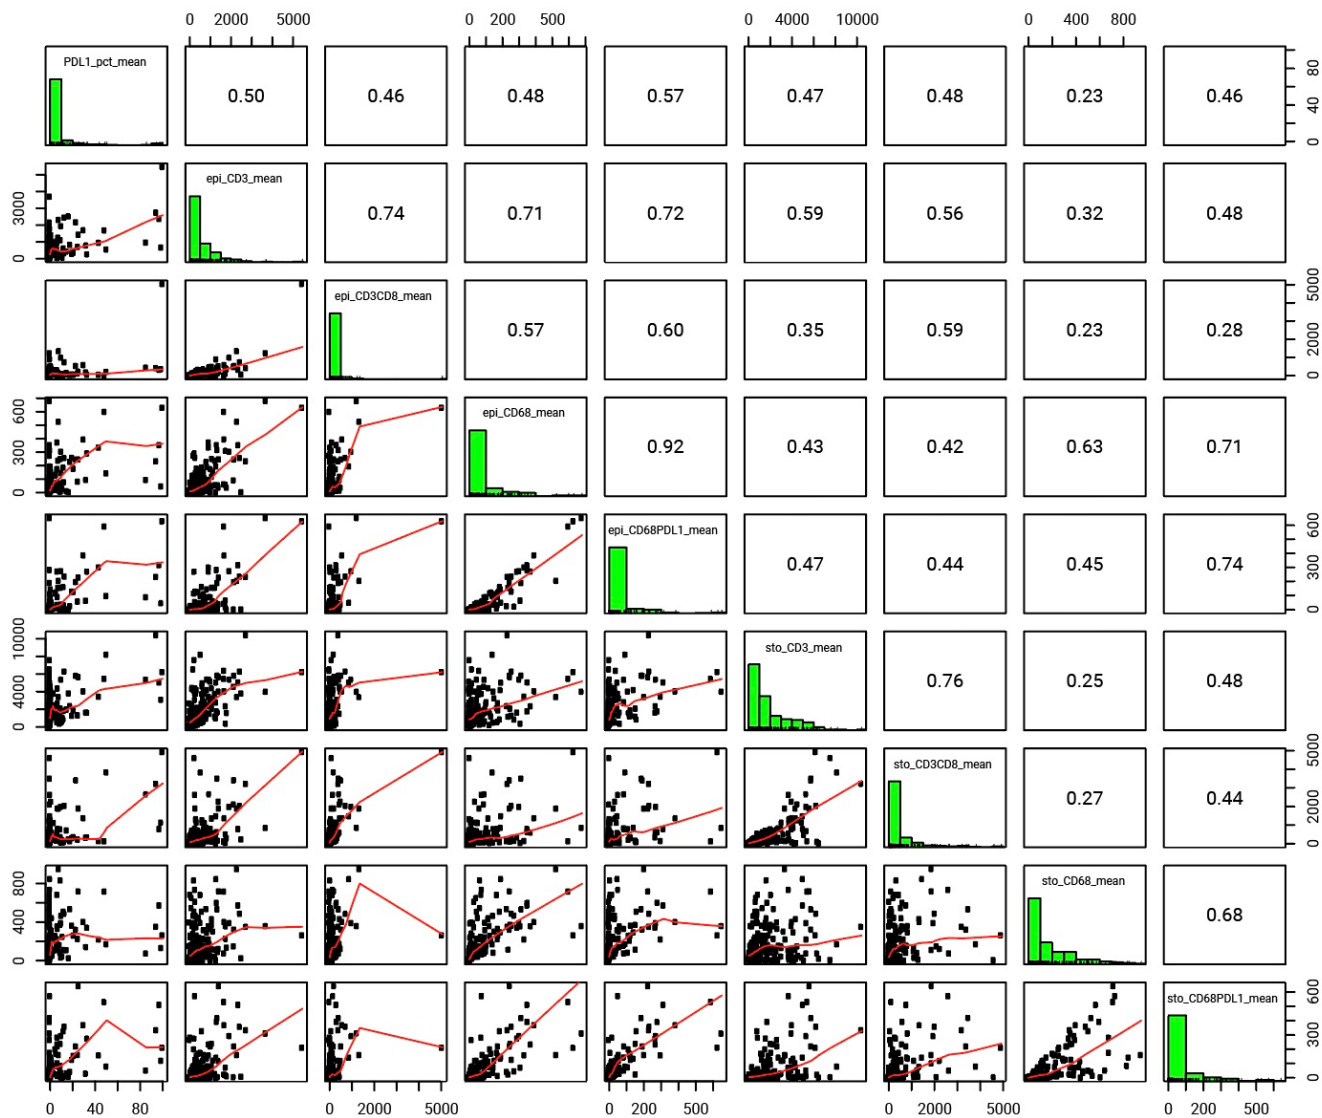

**Supplemental Figure 2.** Spearman correlation between different immune markers. epi CD3, epithelial CD3; str CD3, stromal CD3; total CD3, total CD3 level.

FIGURE S3

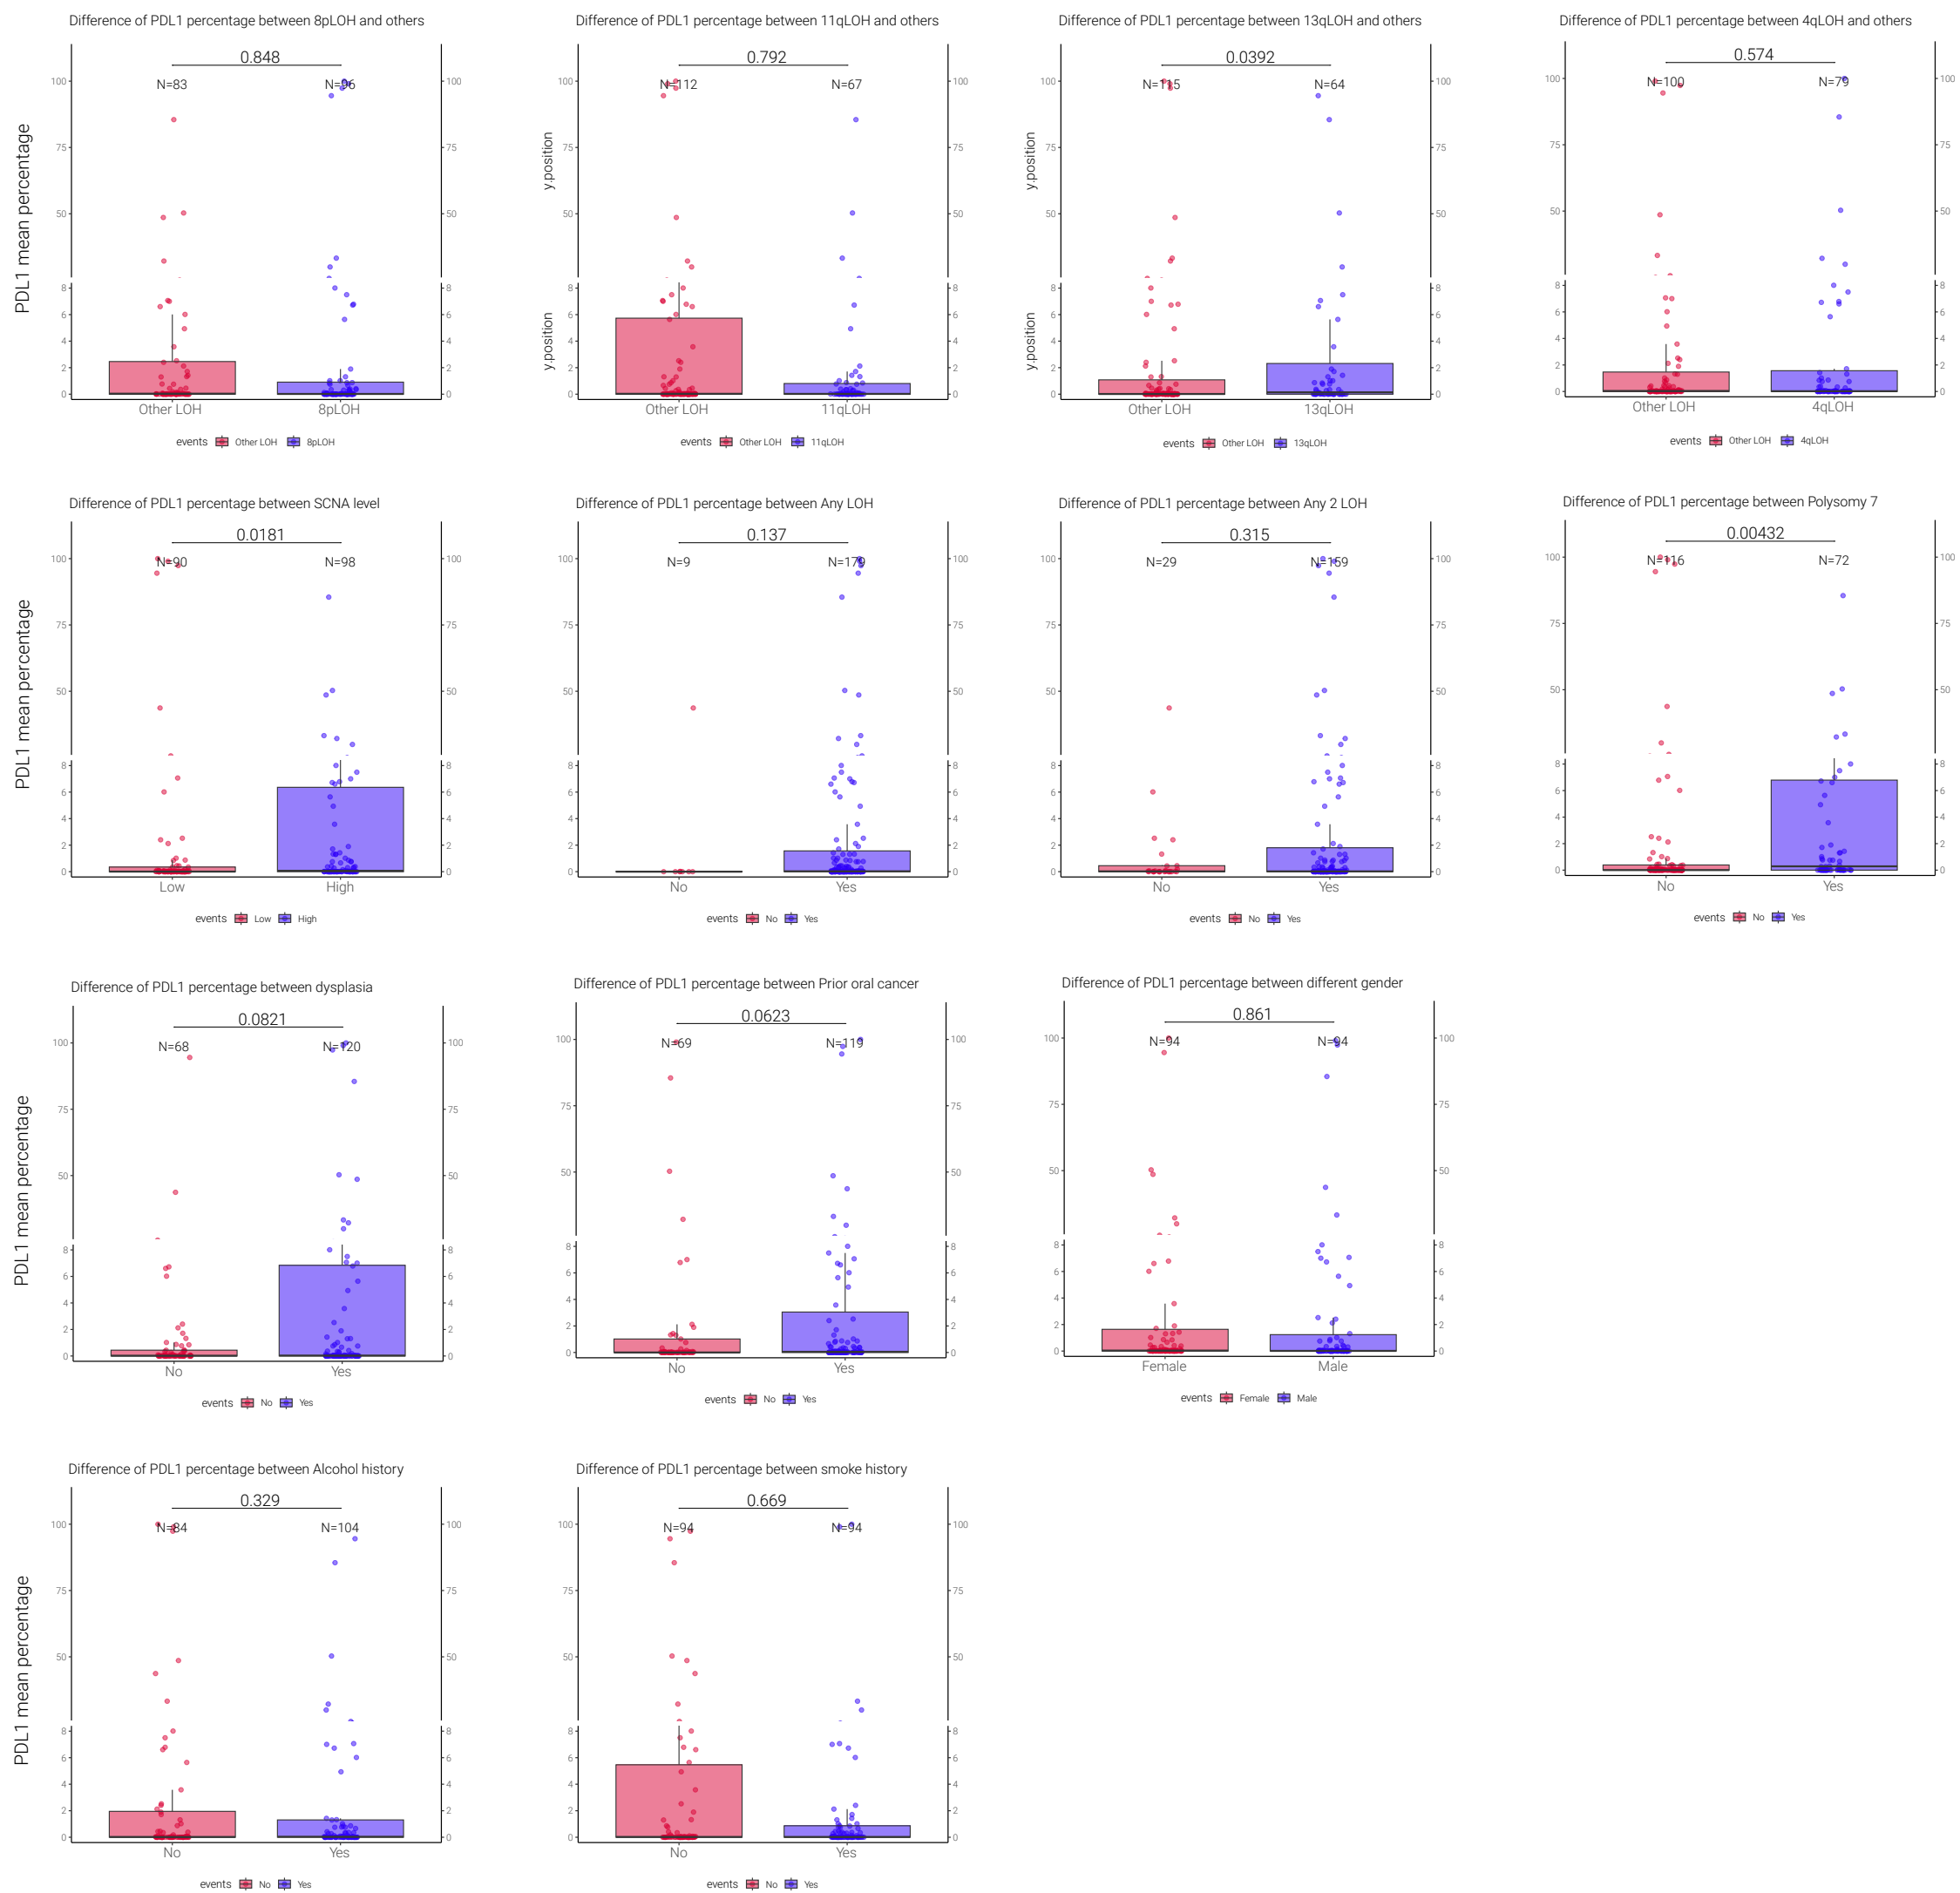

**Supplemental Figure 3.** Box plot of PD-L1 level between different parameters.

*First row:* Box plot of PD-L1 mean percentage between patients with 8pLOH and Other LOH, 11qLOH and Other LOH, 13qLOH and Other LOH, 4qLOH and Other LOH.

*Second row:* Box plot of PD-L1 mean percentage between patients with High SCNA and low SCNA, Any LOH and Others, Any 2 LOH and others, polysomy 7 and no polysomy 7.

*Third row:* Box plot of PD-L1 mean percentage between patients with dysplasia and no dysplasia, prior oral cancer and no prior oral cancer, female and male.

*Fourth row:* Box plot of PD-L1 mean percentage between patients with alcohol history and no alcohol history, smoking history and no smoking history.
